# Supplementary material for: Molecular Diagnostic of Solid Tumor Using a Next Generation Sequencing Custom-Designed Multi-Gene Panel
Source: PubMed Central journal article supplement (PMC7236002; doi:10.3390/diagnostics10040250), 2020-04-23
Supplement: diagnostics-10-00250-s001.pdf [file diagnostics-10-00250-s001.pdf]

SUPPLEMENTARY RESULTS

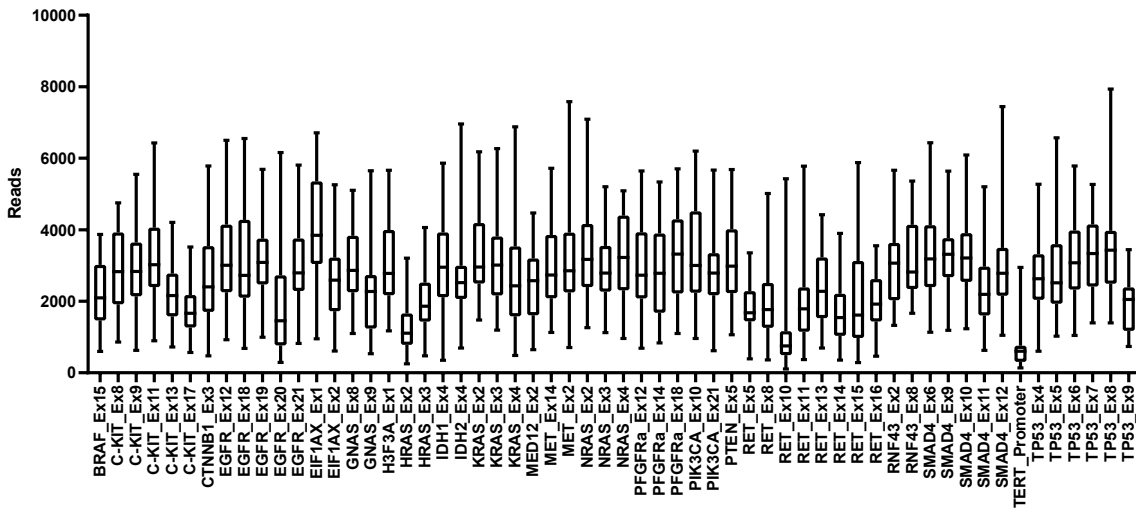

**Figure S1.** Median coverage for gene target regions. Bars indicate the read coverage range per gene target.

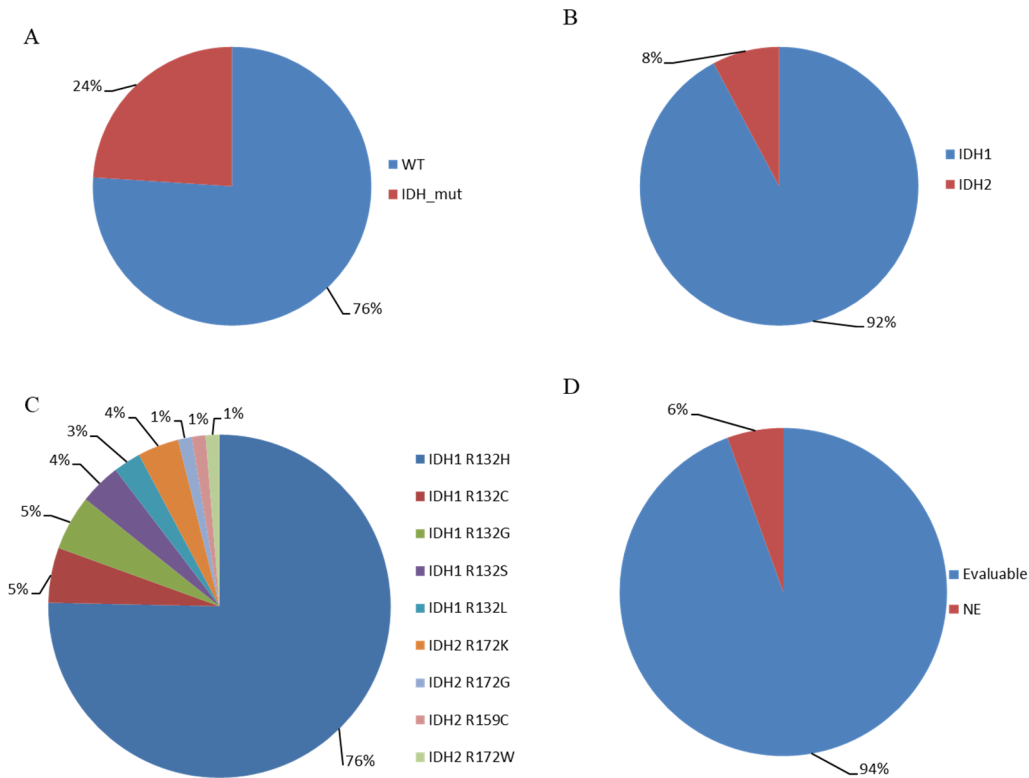

**Figure S2.** Frequency of *IDH1* and *IDH2* mutations in CNS tumor samples. (A) Frequency of *IDH1* or *IDH2* mutations in brain tumor samples; (B) Distribution of mutation between *IDH1* and *IDH2* genes; (C) Type of *IDH1* or *IDH2* mutations identified; (D) Percentage of non-assessable cases due to the lack of amplifiable DNA (NE: not evaluable).

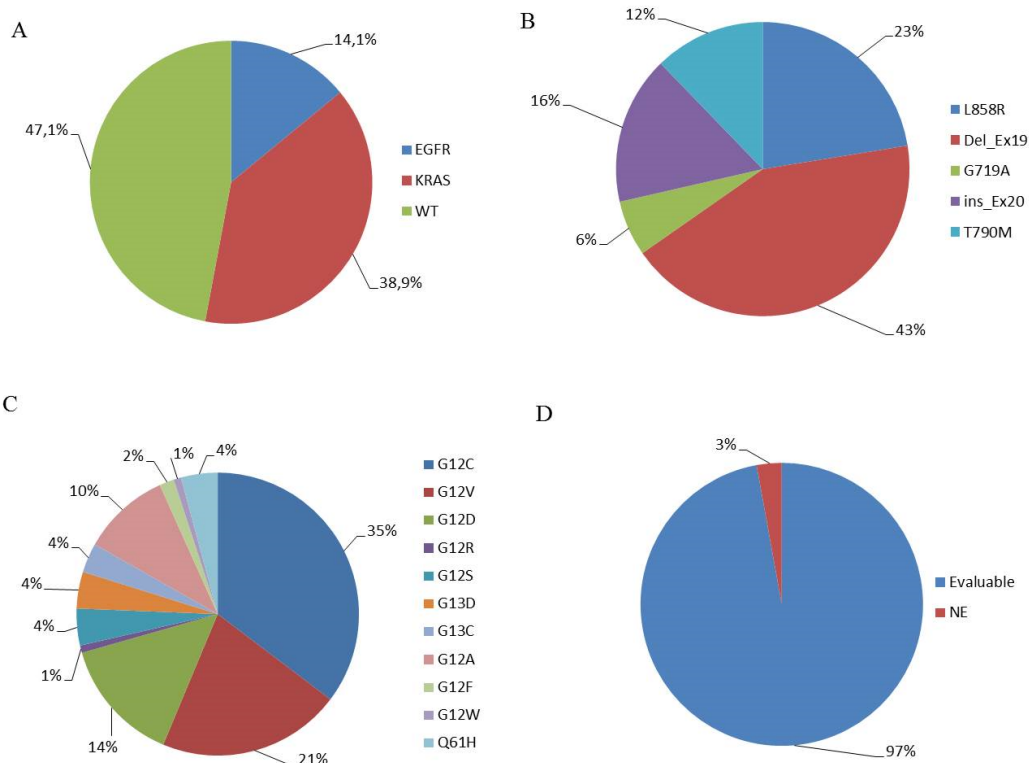

**Figure S3.** Frequency of *EGFR* and *KRAS* mutations in NSCLC samples. (A) Frequency of *EGFR* or *KRAS* mutations in NSCLC samples; (B) Type of *EGFR* mutation identified; (C) Type of *KRAS* mutations identified; (D) Percentage of non-assessable cases due to the lack of amplifiable DNA (NE: not evaluable).

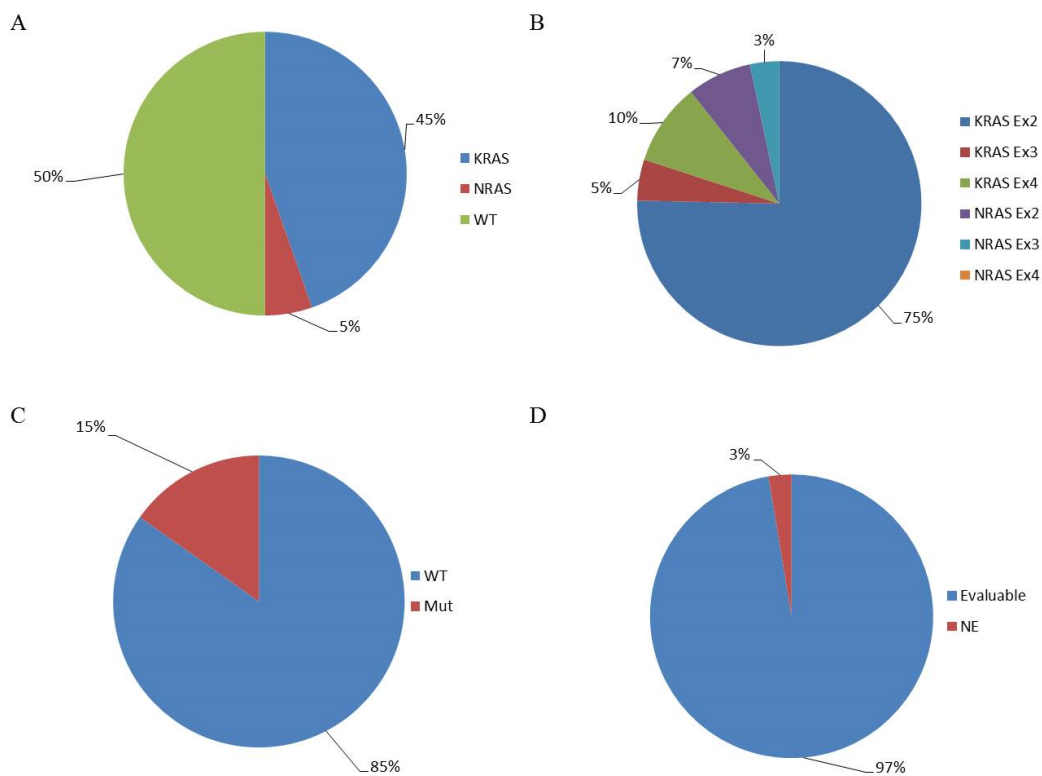

**Figure S4.** Frequency of *KRAS*, *NRAS* and *BRAF* mutations in CRC samples. (A) Frequency of *KRAS* or *NRAS* mutations in CRC samples; (B) Type of *KRAS* and *NRAS* mutations identified; (C) Frequency of *BRAF* mutations identified (WT: Wild-type; Mut: mutated); (D) Percentage of non-assessable cases due to the lack of amplifiable DNA (NE: not evaluable).

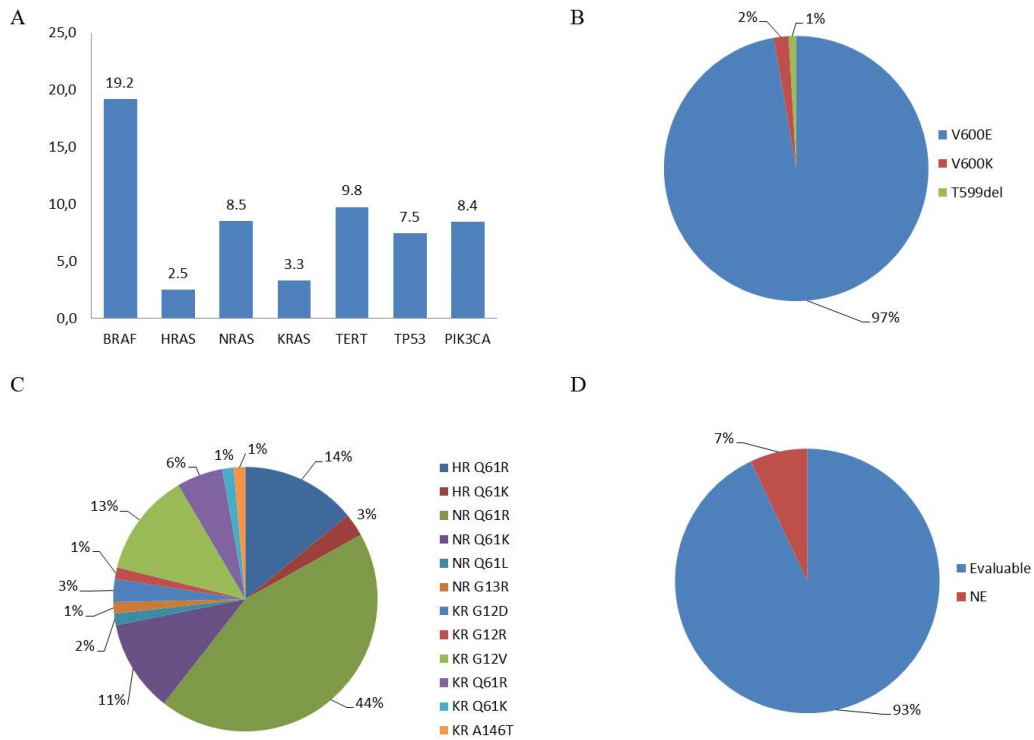

**Figure S5.** Frequency of mutations in Thyroid nodules. (A) Frequency of mutations in thyroid nodules; (B) Type of *BRAF* mutations identified; (C) Type of *KRAS*, *NRAS* and *HRAS* mutations identified (HR: *HRAS*, NR: *NRAS*, KR: *KRAS*); (D) Percentage of non-assessable cases due to the lack of amplifiable DNA (NE: not evaluable).

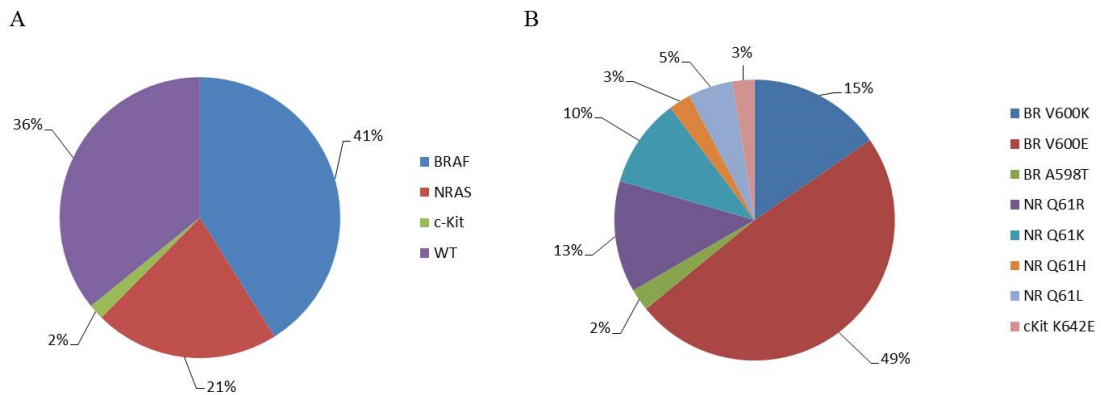

**Figure S6.** Frequency of mutations in Melanoma samples. (A) Frequency of mutations in melanoma samples; (B) Type of mutations identified (BR: *BRAF*; NR: *NRAS*).

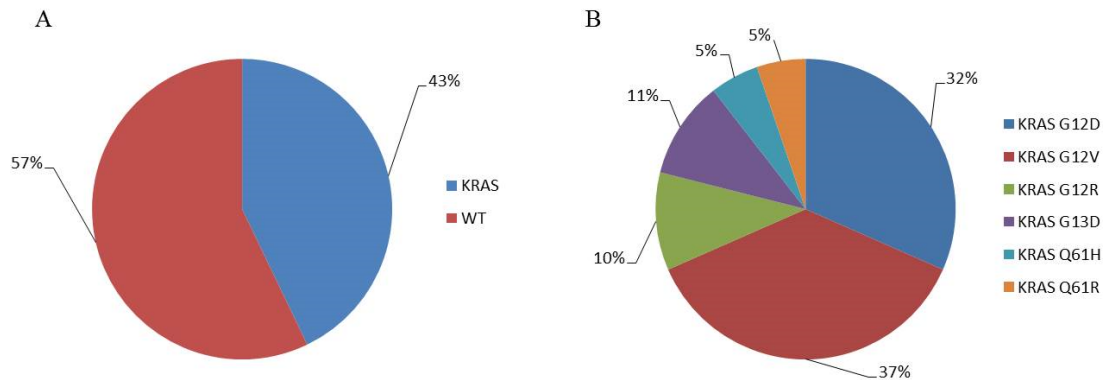

**Figure S7.** Frequency of mutations in Pancreatic lesions. (A) Frequency of *KRAS* mutations in pancreatic lesions; (B) Type of *KRAS* mutations identified.

**Table S1.** Median coverage for gene target regions.

| <b>Gene Target Region</b> | <b>Median Coverage (Number of Reads) ^</b> |
|---------------------------|--------------------------------------------|
| BRAF Ex15                 | 2237                                       |
| C-KIT Ex8                 | 2854                                       |
| C-KIT Ex9                 | 2703–3155                                  |
| C-KIT Ex11                | 3090–3359                                  |
| C-KIT Ex13                | 2283                                       |
| C-KIT Ex17                | 1795–1810                                  |
| CTNNB1 Ex3                | 1755–3233                                  |
| EGFR Ex12                 | 3105–3328                                  |
| EGFR Ex18                 | 2923–3276                                  |
| EGFR Ex19                 | 3159                                       |
| EGFR Ex20                 | 1340–2425                                  |
| EGFR Ex21                 | 2895–3032                                  |
| EIF1AX Ex1                | 4102                                       |
| EIF1AX Ex2                | 2571–2673                                  |
| GNAS Ex8                  | 3006                                       |
| GNAS Ex9                  | 2258                                       |
| H3F3A Ex1                 | 3013–3176                                  |
| HRAS Ex2                  | 1071–1530                                  |
| HRAS Ex3                  | 1617–2362                                  |
| IDH1 Ex4                  | 2791–3391                                  |
| IDH2 Ex4                  | 2332–3073                                  |
| KRAS Ex2                  | 3197–3467                                  |
| KRAS Ex3                  | 3157–3198                                  |
| KRAS Ex4                  | 2283–3188                                  |
| MED12 Ex2                 | 2450                                       |
| MET Ex2                   | 2490–3337                                  |
| MET Ex14                  | 2983–3020                                  |
| NRAS Ex2                  | 3403                                       |
| NRAS Ex3                  | 2824–3099                                  |
| NRAS Ex4                  | 3293–3371                                  |
| PDGFR $\alpha$ Ex12       | 2405–3405                                  |
| PDGFR $\alpha$ Ex14       | 2884                                       |
| PDGFR $\alpha$ Ex18       | 3427–3579                                  |
| PIK3CA Ex10               | 3123–3520                                  |
| PIK3CA Ex21               | 2175–3297                                  |
| PTEN Ex5                  | 2939–3137                                  |
| RET Ex5                   | 1669–1850                                  |
| RET Ex8                   | 1393–2608                                  |
| RET Ex10                  | 1110                                       |
| RET Ex11                  | 1503–2561                                  |
| RET Ex13                  | 2438                                       |
| RET Ex14                  | 1464–1913                                  |
| RET Ex15                  | 1025–3068                                  |
| RET Ex16                  | 2000                                       |
| RNF43 Ex2                 | 2158–2912                                  |
| RNF43 Ex8                 | 1921–2385                                  |
| SMAD4 Ex6                 | 2943–3466                                  |

**Table S1. Cont.**

| <b>Gene Target Region</b>  | <b>Median Coverage (Number of Reads) ^</b> |
|----------------------------|--------------------------------------------|
| SMAD4 Ex9                  | 3253–3368                                  |
| SMAD4 Ex10                 | 3323–3792                                  |
| SMAD4 Ex11                 | 1449–2878                                  |
| SMAD4 Ex12                 | 2743–3173                                  |
| TERT (g.1295141-g.1295471) | 735                                        |
| TP53 Ex4                   | 2388–3230                                  |
| TP53 Ex5                   | 2565–3216                                  |
| TP53 Ex6                   | 3102–3299                                  |
| TP53 Ex7                   | 3272                                       |
| TP53 Ex8                   | 3396                                       |
| TP53 Ex9                   | 1920–3640                                  |

^ For gene target regions covered with more than one amplicon the range of median amplicon coverage (minimal read coverage-maximal read coverage) is reported.

**Table S2. Details of mutations detected in samples analyzed.**

| <b>Lesion</b>   | <b>Genes Mutated<br/>(Number of Mutated Samples)</b> | <b>Type of Mutations<br/>(Number of Samples)</b> | <b>Nucleotide Changes</b> |
|-----------------|------------------------------------------------------|--------------------------------------------------|---------------------------|
| CNS lesions     |                                                      |                                                  |                           |
| Brain neoplasia | <i>IDH1</i> (71)                                     | p.R132C (4)                                      | c.394C>T                  |
|                 |                                                      | p.R132G (4)                                      | c.394G>C                  |
|                 |                                                      | p.R132H (58)                                     | c.395G>A                  |
|                 |                                                      | p.R132L (2)                                      | c.395G>T                  |
|                 |                                                      | p.R132S (3)                                      | c.394G>T                  |
|                 | <i>IDH2</i> (6)                                      | p.R159C (1)                                      | c.475C>T                  |
|                 |                                                      | p.R172G (1)                                      | c.514A>G                  |
|                 |                                                      | p.R172K (3)                                      | c.515G>A                  |
|                 |                                                      | p.R172W (1)                                      | c.514T>A                  |
|                 | <i>H3F3A</i> (2)                                     | p.K28M (2)                                       | c.83A>T                   |
| <i>BRAF</i> (2) | p.V600E (2)                                          | c.1799T>A                                        |                           |
| Sellar lesions  | <i>CTNNB1</i> (2)                                    | p.S37C (2)                                       | c.110C>G                  |

Table S2. Cont.

| Lesion           | Genes Mutated<br>(Number of Mutated Samples) | Type of Mutations<br>(Number of Samples) | Nucleotide Changes |                 |         |
|------------------|----------------------------------------------|------------------------------------------|--------------------|-----------------|---------|
| NSCLCs           | <i>EGFR</i> (35) ^                           | p.G719A (3)                              | c.2156G>C          |                 |         |
|                  |                                              | p.E746_A750delELREA (15)                 | c.2235_2249del     |                 |         |
|                  |                                              | p.E746_T751delELREAT (1)                 | c.2238_2252del     |                 |         |
|                  |                                              | p.E746_S752delELREATS (1)                | c.2236_2256del     |                 |         |
|                  |                                              | p.L747_E749delLRE (1)                    | c.2239_2247del     |                 |         |
|                  |                                              | p.L747_A750delLREA (1)                   | c.2239_2248del     |                 |         |
|                  |                                              | p.L747_P753delinsS (1)                   | c.2240_2257del     |                 |         |
|                  |                                              | p.S752_I759delSPKANKEI (1)               | c.2253_2276del     |                 |         |
|                  |                                              | p.M766_A767insASV (3)                    | c.2296_2297ins9    |                 |         |
|                  |                                              | p.P772_H773insHV (5)                     | c.2316_2317ins6    |                 |         |
|                  |                                              | p.T790M (6)                              | c.2369C>T          |                 |         |
|                  |                                              | p.L858R (11)                             | c.2573T>G          |                 |         |
|                  |                                              | <i>KRAS</i> (119)                        | p.G12A (12)        | c.35G>C         |         |
|                  |                                              |                                          | p.G12C (42)        | c.34G>T         |         |
|                  | p.G12D (17)                                  |                                          | c.35G>A            |                 |         |
|                  | p.G12F (2)                                   |                                          | c.34_35delinsTT    |                 |         |
|                  | p.G12R (1)                                   |                                          | c.34G>C            |                 |         |
|                  | p.G12S (5)                                   |                                          | c.34G>A            |                 |         |
|                  | p.G12V (25)                                  |                                          | c.35G>T            |                 |         |
|                  | p.G12W (1)                                   |                                          | c.34_36delinsTGG   |                 |         |
|                  | p.G13C (4)                                   |                                          | c.37G>T            |                 |         |
|                  | p.G13D (5)                                   |                                          | c.38G>A            |                 |         |
|                  | p.Q61H (5)                                   |                                          | c.183A>C           |                 |         |
|                  | CRC §                                        |                                          | <i>KRAS</i> (135)  | p.G12A (1)      | c.35G>C |
|                  |                                              |                                          |                    | p.G12C (9)      | c.34G>T |
|                  |                                              | p.G12D (39)                              |                    | c.35G>A         |         |
|                  |                                              | p.G12F (1)                               |                    | c.34_35delinsTT |         |
| p.G12R (1)       |                                              | c.34G>C                                  |                    |                 |         |
| p.G12S (7)       |                                              | c.34G>A                                  |                    |                 |         |
| p.G12V (24)      |                                              | c.35G>T                                  |                    |                 |         |
| p.G13C (2)       |                                              | c.37G>T                                  |                    |                 |         |
| p.G13D (25)      |                                              | c.38G>A                                  |                    |                 |         |
| p.G13R (3)       |                                              | c.37G>C                                  |                    |                 |         |
| p.Q61H (4)       |                                              | c.183A>C (3)                             |                    |                 |         |
|                  |                                              | c.183A>T (1)                             |                    |                 |         |
|                  |                                              | p.Q61K (1)                               |                    | c.181C>A        |         |
|                  |                                              | p.Q61R (2)                               |                    | c.182A>G        |         |
|                  |                                              | p.K117N (3)                              |                    | c.351A>T        |         |
|                  |                                              | p.A146P (1)                              |                    | c.436G>C        |         |
|                  |                                              | p.A146T (9)                              |                    | c.436G>A        |         |
|                  |                                              | p.A146V (1)                              | c.437G>A           |                 |         |
| <i>NRAS</i> (17) |                                              | p.G12A (1)                               | c.35G>C            |                 |         |
|                  |                                              | p.G12C (1)                               | c.34G>T            |                 |         |
|                  |                                              | p.G12D (5)                               | c.35G>A            |                 |         |
|                  |                                              | p.G12L (1)                               | c.34delinsCT       |                 |         |
|                  |                                              | p.G12V (1)                               | c.35G>T            |                 |         |
|                  |                                              | p.G13D (1)                               | c.38G>A            |                 |         |
|                  |                                              | p.G13R (1)                               | c.37C>G            |                 |         |
|                  |                                              | p.G13V (1)                               | c.38G>T            |                 |         |
|                  |                                              | p.Q61K (3)                               | c.181C>A           |                 |         |
|                  | p.Q61L (1)                                   | c.182A>T                                 |                    |                 |         |
|                  | p.Q61R (1)                                   | c.182A>G                                 |                    |                 |         |
| <i>BRAF</i> (31) | p.D594G (1)                                  | c.1781A>G                                |                    |                 |         |
|                  | p.V600E (30)                                 | c.1799T>A                                |                    |                 |         |

Table S2. Cont.

| Lesion             | Genes Mutated<br>(Number of Mutated Samples) | Type of Mutations<br>(Number of Samples) | Nucleotide Changes  |
|--------------------|----------------------------------------------|------------------------------------------|---------------------|
| Thyroid nodules *  | <i>BRAF</i> (110)                            | p.T599del (1)                            | c.1795_1797delACA   |
|                    |                                              | p.V600E (107)                            | c.1799T>A           |
|                    |                                              | p.V600K (2)                              | c.1798_1799delinsAA |
|                    | <i>KRAS</i> (18)                             | p.G12D (2)                               | c.35G>A             |
|                    |                                              | p.G12R (1)                               | c.34G>C             |
|                    |                                              | p.G12V (9)                               | c.35G>T             |
|                    |                                              | p.Q61R (4)                               | c.182A>G            |
|                    |                                              | p.Q61K (1)                               | c.181C>A            |
|                    |                                              | p.A146T (1)                              | c.436G>A            |
|                    | <i>HRAS</i> (12)                             | p.Q61K (2)                               | c.181C>A            |
| p.Q61R (10)        |                                              | c.182A>G                                 |                     |
| <i>NRAS</i> (41)   | p.G13R (1)                                   | c.37C>G                                  |                     |
|                    | p.Q61K (8)                                   | c.181C>A                                 |                     |
|                    | p.Q61L (1)                                   | c.182A>T                                 |                     |
|                    | p.Q61R (31)                                  | c.182A>G                                 |                     |
| <i>TERT</i> (12)   | C228T (12)                                   | c.-124C>T                                |                     |
| <i>PIK3CA</i> (7)  | p.R524K (5)                                  | c.1571G>A                                |                     |
|                    | p.P539R (1)                                  | c.1616C>G                                |                     |
|                    | p.E545K (1)                                  | c.1633G>A                                |                     |
| <i>TP53</i> (5)    | p.P67fs (1)                                  | c.200del                                 |                     |
|                    | p.C141Y (1)                                  | c.422G>A                                 |                     |
|                    | p.R248Q (2)                                  | c.743G>A                                 |                     |
|                    | p.R248W (1)                                  | c.742C>T                                 |                     |
| <i>RET</i> (5)     | p.E768D (1)                                  | c.2304G>C                                |                     |
|                    | p.M918T (4)                                  | c.2753T>C                                |                     |
| Melanomas          | <i>BRAF</i> (26)                             | p.A598T (1)                              | c.1792G>A           |
|                    |                                              | p.V600E (19)                             | c.1799T>A           |
|                    |                                              | p.V600K (6)                              | c.1798_1799delinsAA |
| <i>NRAS</i> (12)   | p.Q61H (1)                                   | c.183A>C                                 |                     |
|                    | p.Q61K (4)                                   | c.181C>A                                 |                     |
|                    | p.Q61L (2)                                   | c.182A>T                                 |                     |
|                    | p.Q61R (5)                                   | c.182A>G                                 |                     |
| <i>c-Kit</i> (1)   | p.K642E (1)                                  | c.1924A>G                                |                     |
| Pancreatic lesions | <i>KRAS</i> (18)                             | p.G12D (5)                               | c.35G>A             |
|                    |                                              | p.G12D+p.G12V (1)                        | c.35G>A + c.35G>T   |
|                    |                                              | p.G12R (2)                               | c.34G>C             |
|                    |                                              | p.G12V (6)                               | c.35G>T             |
|                    |                                              | p.G13D (2)                               | c.38G>A             |
|                    |                                              | p.Q61H (1)                               | c.183A>C            |
|                    |                                              | p.Q61R (1)                               | c.182A>G            |
|                    | <i>GNAS</i> (2)                              | p.R844H (2)                              | c.2531G>A           |
| SOC                | <i>TP53</i> (5)                              | p.R175H (1)                              | c.524G>A            |
|                    |                                              | p.C176Y (1)                              | c.527C>T            |
|                    |                                              | p.Y236C (1)                              | c.707A>G            |
|                    |                                              | p.R273H+p.R283C (1)                      | c.818G>A + c.847C>T |
|                    |                                              | p.P278L (1)                              | c.833C>T            |
| GIST               | <i>c-Kit</i> (4)                             | p.W557_K558del (1)                       | c.1669_1674del      |
|                    |                                              | p.V599D (1)                              | c.1676T>A           |
|                    |                                              | p.V560D (2)                              | c.1679T>A           |
| <i>PDGFRα</i> (1)  | p.I843_D846delIMHD (1)                       | c.2527_2538del                           |                     |

<sup>^</sup> *EGFR* p.T790M and Ex 20 insertions are found together with *EGFR* ex19 deletions or p.L858R mutation; <sup>§</sup> One sample was mutated both in *KRAS* and *NRAS* genes; <sup>°</sup> One sample was mutated both in *KRAS* and *GNAS* genes; \* *TERT*, *PIK3CA* and *TP53* mutations in thyroid nodules were found combined with *BRAF* or *RAS* mutations.
